# Supplementary material for: Superalkali character of alkali-monocyclic (pseudo)oxocarbon clusters
Source: Royal Society of Chemistry journal article supplement (doi:10.1039/c3dt50224d), 2013-01-01
Supplement: c3dt50224d.pdf [file c3dt50224d.pdf]

## Superalkali Character of Alkali-Monocyclic (Pseudo)oxocarbons Clusters

Jing Tong,<sup>1</sup> Di Wu,<sup>2</sup> Ying Li,<sup>2</sup> Ying Wang,<sup>1,\*</sup> Zhijian Wu<sup>1,\*</sup>

*<sup>1</sup>State Key Laboratory of Rare Earth Resource Utilization, Changchun Institute of Applied Chemistry, Chinese Academy of Sciences, Changchun 130022, P. R. China*

*<sup>2</sup>Institute of Theoretical Chemistry, State Key Laboratory of Theoretical and Computational Chemistry, Jilin University, Changchun 130023, P. R. China*

---

\* Corresponding authors. Email: [ywang\\_2012@ciac.jl.cn](mailto:ywang_2012@ciac.jl.cn) (YW); [zjwu@ciac.jl.cn](mailto:zjwu@ciac.jl.cn) (ZJW).

**Table S1.** Symmetry Point Group, the Lowest Vibrational Frequencies ( $\nu_1$ , in  $\text{cm}^{-1}$ ), HOMO–LUMO Gaps (in eV) of the  $\text{C}_3\text{X}_3\text{Li}_3$  (X=O, S, Se, NCN, and  $\text{C}(\text{CN})_2$ ) species.

| Species                                                    | Symmetry | $\nu_1(\text{cm}^{-1})$ | Gap(eV) |
|------------------------------------------------------------|----------|-------------------------|---------|
| $\text{C}_3\text{O}_3\text{Li}_3$                          | $C_{2v}$ | 42.6                    | 1.88    |
| $\text{C}_3\text{S}_3\text{Li}_3$                          | $D_{3h}$ | 48.9                    | 3.83    |
| $\text{C}_3\text{Se}_3\text{Li}_3$                         | $C_s$    | 46.0                    | 6.99    |
| $\text{C}_3\text{NCN}_3$                                   | $C_s$    | 39.2                    | 1.58    |
| $\text{C}_3\text{ONCN}_2$                                  | $C_s$    | 43.6                    | 4.64    |
| $\text{C}_3\text{SNCN}_2$                                  | $C_s$    | 42.5                    | 1.97    |
| $\text{C}_3\text{SeNCN}_2$                                 | $C_s$    | 42.2                    | 1.98    |
| $\text{C}_3[\text{C}(\text{CN})_2]_3\text{Li}_3$           | $C_s$    | 47.1                    | 6.10    |
| $\text{C}_3\text{NCN}[\text{C}(\text{CN})_2]_2\text{Li}_3$ | $C_s$    | 56.6                    | 6.29    |
| $\text{C}_3\text{O}[\text{C}(\text{CN})_2]_2\text{Li}_3$   | $C_{2v}$ | 8.5                     | 2.96    |
| $\text{C}_3\text{S}[\text{C}(\text{CN})_2]_2\text{Li}_3$   | $C_1$    | 43.3                    | 6.22    |
| $\text{C}_3\text{Se}[\text{C}(\text{CN})_2]_2\text{Li}_3$  | $C_1$    | 39.7                    | 6.30    |

**Table S2.** Dissociation Channels and Calculated Energies of Dissociation.

| dissociation channel                             | $\Delta E$ (kcal/mol) |
|--------------------------------------------------|-----------------------|
| $C_3O_3Li_3^+ \rightarrow 3CO + Li_3^+$          | 102.8                 |
| $C_3O_3Li_3^+ \rightarrow C_3O_3^{2-} + 3Li^+$   | 481.4                 |
| $C_3S_3Li_3^+ \rightarrow C_3S_3 + Li_3^+$       | 162.3                 |
| $C_3S_3Li_3^+ \rightarrow C_3S_3^{2-} + 3Li^+$   | 417.0                 |
| $C_3Se_3Li_3^+ \rightarrow C_3Se_3 + Li_3^+$     | 161.3                 |
| $C_3Se_3Li_3^+ \rightarrow C_3Se_3^{2-} + 3Li^+$ | 407.4                 |

**Table S3.** Dissociation Channels and Calculated Energies of Dissociation.

| dissociation channel                                   | $\Delta E$ (kcal/mol) |
|--------------------------------------------------------|-----------------------|
| $C_3NCN_3Li_3^+ \rightarrow C_3NCN_3 + Li_3^+$         | 191.3                 |
| $C_3NCN_3Li_3^+ \rightarrow C_3NCN_3^{2-} + 3Li^+$     | 402.7                 |
| $C_3ONCN_2Li_3^+ \rightarrow C_3ONCN_2 + Li_3^+$       | 185.5                 |
| $C_3ONCN_2Li_3^+ \rightarrow C_3ONCN_2^{2-} + 3Li^+$   | 420.4                 |
| $C_3SNCN_2Li_3^+ \rightarrow C_3SNCN_2 + Li_3^+$       | 184.6                 |
| $C_3SNCN_2Li_3^+ \rightarrow C_3SNCN_2^{2-} + 3Li^+$   | 410.5                 |
| $C_3SeNCN_2Li_3^+ \rightarrow C_3SeNCN_2 + Li_3^+$     | 184.0                 |
| $C_3SeNCN_2Li_3^+ \rightarrow C_3SeNCN_2^{2-} + 3Li^+$ | 407.4                 |

**Table S4.** Dissociation Channels and Calculated Energies of Dissociation.

| dissociation channel                                                 | $\Delta E$ (kcal/mol) |
|----------------------------------------------------------------------|-----------------------|
| $C_3[C(CN)_2]_3Li_3^+ \rightarrow C_3[C(CN)_2]_3 + Li_3^+$           | 220.7                 |
| $C_3[C(CN)_2]_3Li_3^+ \rightarrow C_3[C(CN)_2]_3^{2-} + 3Li^+$       | 417.5                 |
| $C_3NCN[C(CN)_2]_2Li_3^+ \rightarrow C_3NCN[C(CN)_2]_2 + Li_3^+$     | 210.1                 |
| $C_3NCN[C(CN)_2]_2Li_3^+ \rightarrow C_3NCN[C(CN)_2]_2^{2-} + 3Li^+$ | 411.2                 |
| $C_3O[C(CN)_2]_2Li_3^+ \rightarrow C_3O[C(CN)_2]_2 + Li_3^+$         | 187.7                 |
| $C_3O[C(CN)_2]_2Li_3^+ \rightarrow C_3O[C(CN)_2]_2^{2-} + 3Li^+$     | 406.2                 |
| $C_3S[C(CN)_2]_2Li_3^+ \rightarrow C_3S[C(CN)_2]_2 + Li_3^+$         | 190.7                 |
| $C_3S[C(CN)_2]_2Li_3^+ \rightarrow C_3S[C(CN)_2]_2^{2-} + 3Li^+$     | 404.1                 |
| $C_3Se[C(CN)_2]_2Li_3^+ \rightarrow C_3Se[C(CN)_2]_2 + Li_3^+$       | 190.7                 |
| $C_3Se[C(CN)_2]_2Li_3^+ \rightarrow C_3Se[C(CN)_2]_2^{2-} + 3Li^+$   | 402.7                 |

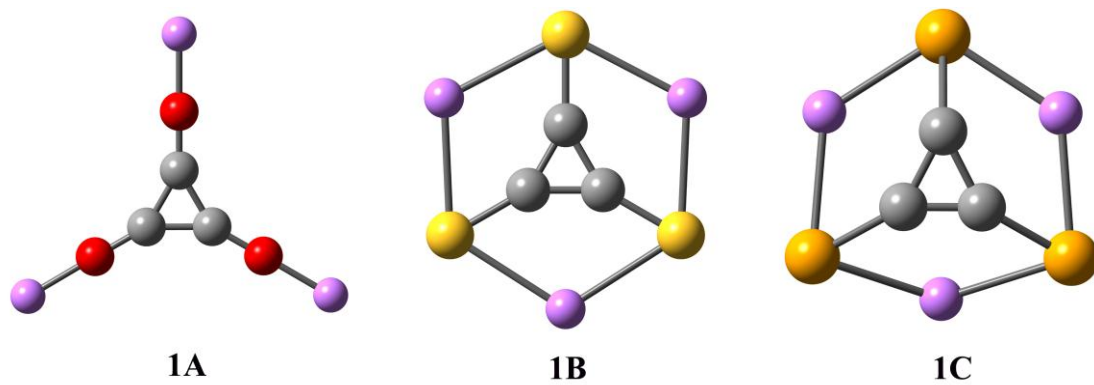

**Figure S1.** The minimum energy structures of three polynuclear superalkali species (**1A**) $C_3O_3Li_3$ , (**1B**) $C_3S_3Li_3$ , and (**1C**) $C_3Se_3Li_3$ . For common atoms, grey color is for carbon, light purple for lithium, blue for nitrogen.

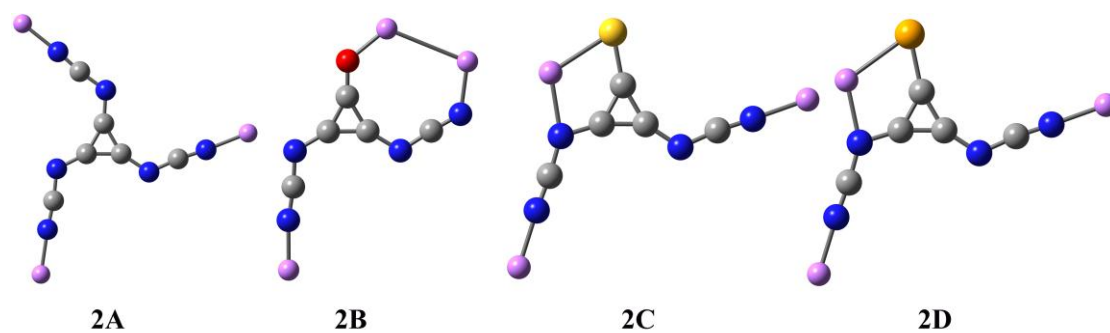

**Figure S2.** The minimum energy structures of four polynuclear superalkali species: **(2A)** $C_3NCN_3Li_3$ , **(2B)** $C_3ONCN_2Li_3$ , **(2C)** $C_3SNCN_2Li_3$  and **(2D)** $C_3SeNCN_2Li_3$ . For common atoms, grey color is for carbon, light purple for lithium, blue for nitrogen.

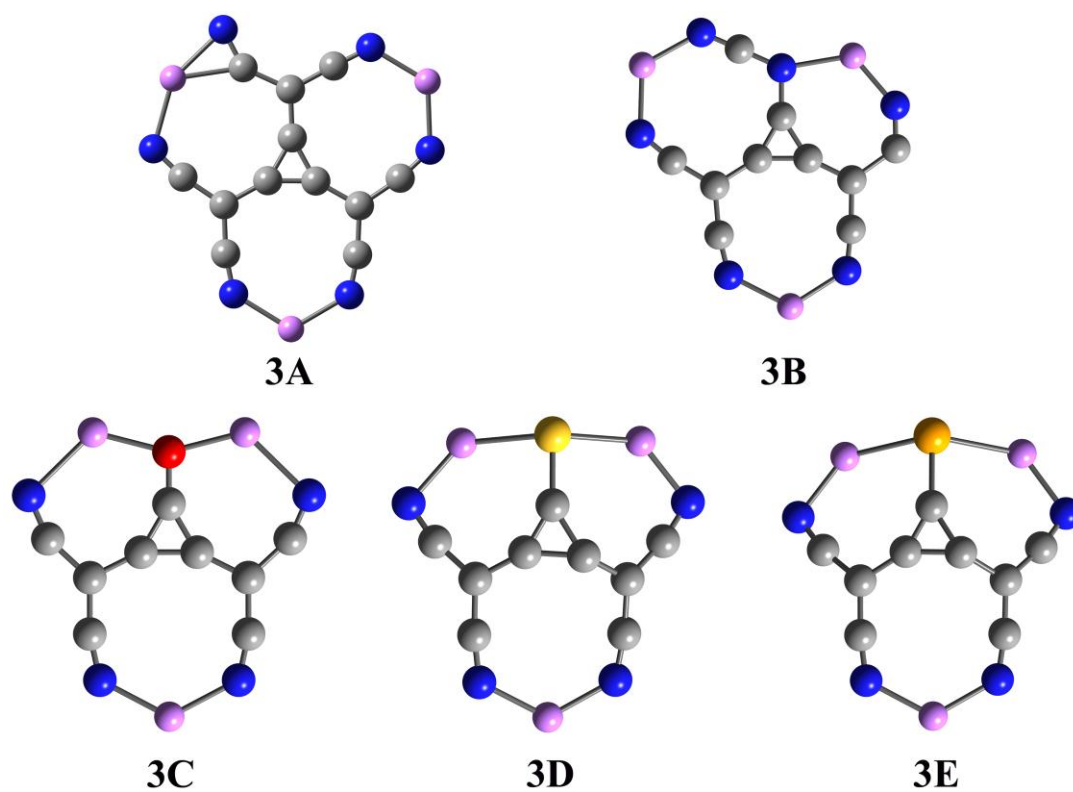

**Figure S3.** The minimum energy structures of five polynuclear superalkali species:  
(**3A**)C<sub>3</sub>[C(CN)<sub>2</sub>]<sub>3</sub>Li<sub>3</sub>, (**3B**)C<sub>3</sub>NCN[C(CN)<sub>2</sub>]<sub>2</sub>Li<sub>3</sub>, (**3C**)C<sub>3</sub>O[C(CN)<sub>2</sub>]<sub>2</sub>Li<sub>3</sub>, (**3D**)C<sub>3</sub>S[C(CN)<sub>2</sub>]<sub>2</sub>Li<sub>3</sub> and  
(**3E**)C<sub>3</sub>Se[C(CN)<sub>2</sub>]<sub>2</sub>Li<sub>3</sub>. For common atoms, grey color is for carbon, light purple for lithium, blue  
for nitrogen.

Cartesian atomic coordinates and total energies of all calculated structures:

**1A<sup>+</sup> -362.5955527**

|    |             |             |            |
|----|-------------|-------------|------------|
| C  | 0.00000000  | 0.81131400  | 0.00000000 |
| C  | 0.70261900  | -0.40565700 | 0.00000000 |
| C  | -0.70261900 | -0.40565700 | 0.00000000 |
| O  | -1.80551200 | -1.04241300 | 0.00000000 |
| O  | 0.00000000  | 2.08482600  | 0.00000000 |
| O  | 1.80551200  | -1.04241300 | 0.00000000 |
| Li | 0.00000000  | 3.74366400  | 0.00000000 |
| Li | 3.24210800  | -1.87183200 | 0.00000000 |
| Li | -3.24210800 | -1.87183200 | 0.00000000 |

**1B<sup>+</sup> -1331.4935467**

|    |             |             |            |
|----|-------------|-------------|------------|
| C  | 0.00000000  | 0.80945500  | 0.00000000 |
| C  | 0.70100900  | -0.40472700 | 0.00000000 |
| C  | -0.70100900 | -0.40472700 | 0.00000000 |
| Li | -2.24827400 | 1.29804100  | 0.00000000 |
| Li | 2.24827400  | 1.29804100  | 0.00000000 |
| Li | 0.00000000  | -2.59608300 | 0.00000000 |
| S  | 0.00000000  | 2.49735500  | 0.00000000 |
| S  | -2.16277300 | -1.24867800 | 0.00000000 |
| S  | 2.16277300  | -1.24867800 | 0.00000000 |

**1C<sup>+</sup> -7341.4941978**

|    |             |             |            |
|----|-------------|-------------|------------|
| C  | 0.00000000  | 0.80857500  | 0.00000000 |
| C  | 0.70024600  | -0.40428700 | 0.00000000 |
| C  | -0.70024600 | -0.40428700 | 0.00000000 |
| Li | -2.28862100 | 1.32133600  | 0.00000000 |
| Li | 2.28862100  | 1.32133600  | 0.00000000 |
| Li | 0.00000000  | -2.64267200 | 0.00000000 |
| Se | 0.00000000  | 2.64876400  | 0.00000000 |
| Se | 2.29389700  | -1.32438200 | 0.00000000 |
| Se | -2.29389700 | -1.32438200 | 0.00000000 |

**2A<sup>+</sup> -579.73629**

|   |             |             |            |
|---|-------------|-------------|------------|
| C | 0.00000000  | 0.80393300  | 0.00000000 |
| C | 0.69622600  | -0.40196600 | 0.00000000 |
| C | -0.69622600 | -0.40196600 | 0.00000000 |
| N | 1.80877100  | -1.13518100 | 0.00000000 |
| N | -1.88748100 | -0.99885100 | 0.00000000 |
| N | 0.07871000  | 2.13403200  | 0.00000000 |
| C | -2.04092200 | -2.26419000 | 0.00000000 |
| C | 2.98130700  | -0.63539600 | 0.00000000 |

|    |             |             |            |
|----|-------------|-------------|------------|
| C  | -0.94038500 | 2.89958500  | 0.00000000 |
| N  | -1.79411500 | 3.71169600  | 0.00000000 |
| N  | -2.31736500 | -3.40959700 | 0.00000000 |
| N  | 4.11148000  | -0.30209900 | 0.00000000 |
| Li | -3.10942900 | 4.91662400  | 0.00000000 |
| Li | 5.81263500  | 0.23453200  | 0.00000000 |
| Li | -2.70320700 | -5.15115600 | 0.00000000 |

**2B<sup>+</sup> -507.3555936**

|    |             |             |            |
|----|-------------|-------------|------------|
| C  | 0.00000000  | 0.43703200  | 0.00000000 |
| C  | 0.81854000  | -0.69416200 | 0.00000000 |
| C  | 1.39421100  | 0.57361800  | 0.00000000 |
| N  | 1.01426000  | -2.01482300 | 0.00000000 |
| N  | -1.26231000 | 0.87580100  | 0.00000000 |
| C  | 0.07585300  | -2.87552600 | 0.00000000 |
| C  | -1.61571000 | 2.09571000  | 0.00000000 |
| N  | -2.08158300 | 3.18074100  | 0.00000000 |
| N  | -0.69182400 | -3.77035300 | 0.00000000 |
| Li | -2.93472700 | 4.74339900  | 0.00000000 |
| Li | -1.83279500 | -5.13848900 | 0.00000000 |
| Li | 3.99752100  | 1.87834600  | 0.00000000 |
| O  | 2.42785600  | 1.30382900  | 0.00000000 |

**2C<sup>+</sup> -830.3281354**

|    |             |             |            |
|----|-------------|-------------|------------|
| C  | 0.00000000  | 0.62547600  | 0.00000000 |
| C  | 0.29934600  | -0.71826400 | 0.00000000 |
| C  | -1.03714400 | -0.34291800 | 0.00000000 |
| N  | 0.97224600  | -1.89910900 | 0.00000000 |
| N  | 0.45121300  | 1.86966500  | 0.00000000 |
| C  | 2.25746500  | -1.97570400 | 0.00000000 |
| C  | -0.32520200 | 2.88716200  | 0.00000000 |
| N  | -0.93270800 | 3.89294300  | 0.00000000 |
| N  | 3.41718200  | -2.14260000 | 0.00000000 |
| Li | -1.94997400 | 5.37365500  | 0.00000000 |
| Li | 5.21988200  | -2.31845800 | 0.00000000 |
| Li | -0.95551900 | -2.68931900 | 0.00000000 |
| S  | -2.59159300 | -0.99990200 | 0.00000000 |

**2D<sup>+</sup> -2833.6619544**

|   |             |             |            |
|---|-------------|-------------|------------|
| C | 0.68572900  | -0.69373100 | 0.00000000 |
| C | -0.69076400 | -0.65416400 | 0.00000000 |
| C | 0.00000000  | 0.54563800  | 0.00000000 |
| N | -1.99808700 | -1.02235800 | 0.00000000 |
| N | 1.78364400  | -1.42995500 | 0.00000000 |



|                       |                     |             |             |
|-----------------------|---------------------|-------------|-------------|
| C                     | -2.37690400         | -2.25372600 | 0.00000000  |
| C                     | 2.95781400          | -0.91839200 | 0.00000000  |
| N                     | 4.07909000          | -0.56857300 | 0.00000000  |
| N                     | -2.81332300         | -3.34066700 | 0.00000000  |
| Li                    | 5.76078300          | 0.06699000  | 0.00000000  |
| Li                    | -3.40810500         | -5.05290300 | 0.00000000  |
| Li                    | -2.39025500         | 1.01287700  | 0.00000000  |
| Se                    | -0.31475800         | 2.36165400  | 0.00000000  |
| <b>3A<sup>+</sup></b> | <b>-808.4536319</b> |             |             |
| C                     | 0.00000000          | 0.00000000  | 0.79926600  |
| C                     | 0.00000000          | 0.69223900  | -0.39962600 |
| C                     | 0.00000000          | -0.69223900 | -0.39962600 |
| C                     | 0.00000000          | 0.00000000  | 2.20705300  |
| C                     | 0.00000000          | 1.91155100  | -1.10351800 |
| C                     | 0.00000000          | -1.91155100 | -1.10351800 |
| C                     | 0.00000000          | -1.25076800 | 2.83928700  |
| C                     | 0.00000000          | 1.25076800  | 2.83928700  |
| C                     | 0.00000000          | 3.08464600  | -0.33650300 |
| C                     | 0.00000000          | 1.83370200  | -2.50287700 |
| C                     | 0.00000000          | -1.83370200 | -2.50287700 |
| C                     | 0.00000000          | -3.08464600 | -0.33650300 |
| N                     | 0.00000000          | 3.93463600  | 0.45425300  |
| N                     | 0.00000000          | 2.36056200  | 3.17996900  |
| N                     | 0.00000000          | -2.36056200 | 3.17996900  |
| N                     | 0.00000000          | -3.93463600 | 0.45425300  |
| N                     | 0.00000000          | -1.57393200 | -3.63436000 |
| N                     | 0.00000000          | 1.57393200  | -3.63436000 |
| Li                    | 0.00000000          | 4.14115300  | 2.39138300  |
| Li                    | 0.00000000          | 0.00000000  | -4.78180900 |
| Li                    | 0.00000000          | -4.14115300 | 2.39138300  |
| <b>3B<sup>+</sup></b> | <b>-732.2143598</b> |             |             |
| C                     | 0.34708700          | -0.85167700 | 0.00000000  |
| C                     | -0.97481900         | -0.48445100 | 0.00000000  |
| C                     | 0.00000000          | 0.49796200  | 0.00000000  |
| C                     | 1.24360500          | -1.93287200 | 0.00000000  |
| C                     | 0.41664600          | 1.84106900  | 0.00000000  |
| C                     | 2.61194100          | -1.64948900 | 0.00000000  |
| C                     | 0.52187600          | -3.13974800 | 0.00000000  |
| C                     | -0.60823000         | 2.79794900  | 0.00000000  |
| C                     | 1.80431100          | 2.04223600  | 0.00000000  |
| N                     | -0.36246900         | -3.89636100 | 0.00000000  |
| N                     | 3.67136500          | -1.17364400 | 0.00000000  |

|    |             |             |            |
|----|-------------|-------------|------------|
| N  | 2.96311100  | 1.96872900  | 0.00000000 |
| N  | -1.60261300 | 3.39718600  | 0.00000000 |
| N  | -2.25545800 | -0.91392400 | 0.00000000 |
| C  | -3.10808000 | 0.09144100  | 0.00000000 |
| N  | -3.80424600 | 1.02486300  | 0.00000000 |
| Li | -3.51557500 | 2.94800500  | 0.00000000 |
| Li | 4.40605400  | 0.64431900  | 0.00000000 |
| Li | -2.15510100 | -2.96647600 | 0.00000000 |

**3C<sup>+</sup> -659.8089595**

|    |            |             |             |
|----|------------|-------------|-------------|
| C  | 0.00000000 | 0.69665900  | 0.21309500  |
| C  | 0.00000000 | 0.00000000  | 1.40482900  |
| C  | 0.00000000 | -0.69665900 | 0.21309500  |
| C  | 0.00000000 | 1.94947600  | -0.42346700 |
| C  | 0.00000000 | -1.94947600 | -0.42346700 |
| C  | 0.00000000 | 1.94408000  | -1.82064400 |
| C  | 0.00000000 | 2.95042300  | 0.56405000  |
| C  | 0.00000000 | -2.95042300 | 0.56405000  |
| C  | 0.00000000 | -1.94408000 | -1.82064400 |
| N  | 0.00000000 | 3.43902800  | 1.62143000  |
| N  | 0.00000000 | 1.65232200  | -2.94544200 |
| N  | 0.00000000 | -1.65232200 | -2.94544200 |
| N  | 0.00000000 | -3.43902800 | 1.62143000  |
| Li | 0.00000000 | 1.96203900  | 3.03634400  |
| Li | 0.00000000 | -1.96203900 | 3.03634400  |
| Li | 0.00000000 | 0.00000000  | -4.02120800 |
| O  | 0.00000000 | 0.00000000  | 2.69454200  |

**3D<sup>+</sup> -982.7874305**

|    |            |             |             |
|----|------------|-------------|-------------|
| C  | 0.00000000 | 0.69191100  | -0.02186700 |
| C  | 0.00000000 | 0.00000000  | 1.17610700  |
| C  | 0.00000000 | -0.69191100 | -0.02186700 |
| C  | 0.00000000 | 1.93190600  | -0.67622000 |
| C  | 0.00000000 | -1.93190600 | -0.67622000 |
| C  | 0.00000000 | 1.90774300  | -2.07541300 |
| C  | 0.00000000 | 2.98668800  | 0.25043200  |
| C  | 0.00000000 | -2.98668800 | 0.25043200  |
| C  | 0.00000000 | -1.90774300 | -2.07541300 |
| N  | 0.00000000 | 3.59353300  | 1.24291000  |
| N  | 0.00000000 | 1.62765700  | -3.20241200 |
| N  | 0.00000000 | -1.62765700 | -3.20241200 |
| N  | 0.00000000 | -3.59353300 | 1.24291000  |
| Li | 0.00000000 | 2.50349100  | 2.89988600  |
| Li | 0.00000000 | -2.50349100 | 2.89988600  |

|                       |                      |             |             |
|-----------------------|----------------------|-------------|-------------|
| Li                    | 0.00000000           | 0.00000000  | -4.30349700 |
| S                     | 0.00000000           | 0.00000000  | 2.88527400  |
| <b>3E<sup>+</sup></b> | <b>-2986.1212272</b> |             |             |
| C                     | 0.00000000           | 0.69227400  | -0.47240500 |
| C                     | 0.00000000           | 0.00000000  | 0.72411800  |
| C                     | 0.00000000           | -0.69227400 | -0.47240500 |
| C                     | 0.00000000           | 1.92925900  | -1.13104400 |
| C                     | 0.00000000           | -1.92925900 | -1.13104400 |
| C                     | 0.00000000           | 1.90098000  | -2.53060300 |
| C                     | 0.00000000           | 2.99414600  | -0.21634000 |
| C                     | 0.00000000           | -2.99414600 | -0.21634000 |
| C                     | 0.00000000           | -1.90098000 | -2.53060300 |
| N                     | 0.00000000           | 3.62233400  | 0.76234600  |
| N                     | 0.00000000           | 1.62273000  | -3.65790500 |
| N                     | 0.00000000           | -1.62273000 | -3.65790500 |
| N                     | 0.00000000           | -3.62233400 | 0.76234600  |
| Li                    | 0.00000000           | 2.63599800  | 2.47110200  |
| Li                    | 0.00000000           | -2.63599800 | 2.47110200  |
| Li                    | 0.00000000           | 0.00000000  | -4.76405400 |
| Se                    | 0.00000000           | 0.00000000  | 2.58421700  |
| <b>1A</b>             | <b>-362.7162128</b>  |             |             |
| C                     | 0.00000000           | 0.00000000  | 0.81378800  |
| C                     | 0.00000000           | 0.70310200  | -0.40406700 |
| C                     | 0.00000000           | -0.70310200 | -0.40406700 |
| O                     | 0.00000000           | -1.80551100 | -1.04123000 |
| O                     | 0.00000000           | 0.00000000  | 2.08710200  |
| O                     | 0.00000000           | 1.80551100  | -1.04123000 |
| Li                    | 0.00000000           | 0.00000000  | 3.75748700  |
| Li                    | 0.00000000           | 3.24397300  | -1.89058700 |
| Li                    | 0.00000000           | -3.24397300 | -1.89058700 |
| <b>1B</b>             | <b>-1331.6282528</b> |             |             |
| C                     | 0.00000000           | 0.80942000  | 0.00000000  |
| C                     | 0.70097800           | -0.40471000 | 0.00000000  |
| C                     | -0.70097800          | -0.40471000 | 0.00000000  |
| Li                    | -2.27723000          | 1.31475900  | 0.00000000  |
| Li                    | 2.27723000           | 1.31475900  | 0.00000000  |
| Li                    | 0.00000000           | -2.62951800 | 0.00000000  |
| S                     | 0.00000000           | 2.49879300  | 0.00000000  |
| S                     | -2.16401800          | -1.24939600 | 0.00000000  |
| S                     | 2.16401800           | -1.24939600 | 0.00000000  |

**1C -7341.6724894**

|    |             |             |             |
|----|-------------|-------------|-------------|
| C  | -0.79796200 | 0.09502200  | 0.67154200  |
| C  | -0.79796200 | 0.09502200  | -0.67154200 |
| C  | -0.18289100 | 1.25880000  | 0.00000000  |
| Li | 0.96269600  | 0.77638000  | 2.02442500  |
| Li | -0.55083400 | -2.08218400 | 0.00000000  |
| Li | 0.96269600  | 0.77638000  | -2.02442500 |
| Se | -0.79796200 | -0.99184300 | 2.21870600  |
| Se | -0.79796200 | -0.99184300 | -2.21870600 |
| Se | 1.78854800  | 1.77472100  | 0.00000000  |

**2A -579.8557455**

|    |             |             |            |
|----|-------------|-------------|------------|
| C  | 0.00000000  | 0.80407600  | 0.00000000 |
| C  | 0.69618200  | -0.40251100 | 0.00000000 |
| C  | -0.69685800 | -0.40213500 | 0.00000000 |
| N  | 1.81108600  | -1.13459200 | 0.00000000 |
| N  | -1.88831700 | -1.00160000 | 0.00000000 |
| N  | 0.07678900  | 2.13562700  | 0.00000000 |
| C  | -2.01350200 | -2.27511500 | 0.00000000 |
| C  | 2.97656300  | -0.60620900 | 0.00000000 |
| C  | -0.96319700 | 2.88123100  | 0.00000000 |
| N  | -1.83701200 | 3.66950300  | 0.00000000 |
| N  | -2.25847400 | -3.42616100 | 0.00000000 |
| N  | 4.09589200  | -0.24286400 | 0.00000000 |
| Li | -3.25500800 | 4.79502200  | 0.00000000 |
| Li | 5.77909300  | 0.42367500  | 0.00000000 |
| Li | -2.52237200 | -5.21716700 | 0.00000000 |

**2B -507.4953884**

|    |             |             |            |
|----|-------------|-------------|------------|
| C  | 0.00000000  | 0.32760700  | 0.00000000 |
| C  | 0.48691100  | -0.97377100 | 0.00000000 |
| C  | 1.39142100  | 0.08849000  | 0.00000000 |
| N  | 0.26998200  | -2.30685500 | 0.00000000 |
| N  | -1.05987300 | 1.15278200  | 0.00000000 |
| C  | -0.88841700 | -2.81266900 | 0.00000000 |
| C  | -0.80290700 | 2.41537400  | 0.00000000 |
| N  | -0.62365500 | 3.57999500  | 0.00000000 |
| N  | -1.92206500 | -3.39300800 | 0.00000000 |
| Li | 1.01799100  | 4.46968900  | 0.00000000 |
| Li | -3.56570800 | -4.01021900 | 0.00000000 |
| Li | 3.12226100  | 2.23805400  | 0.00000000 |
| O  | 2.56294900  | 0.55085500  | 0.00000000 |

**2C -830.4580287**

|           |                      |             |            |
|-----------|----------------------|-------------|------------|
| C         | 0.00000000           | 0.62300700  | 0.00000000 |
| C         | 0.27845200           | -0.73052600 | 0.00000000 |
| C         | -1.04919500          | -0.32751700 | 0.00000000 |
| N         | 0.92379600           | -1.92157100 | 0.00000000 |
| N         | 0.48215900           | 1.85278900  | 0.00000000 |
| C         | 2.22048900           | -2.00816000 | 0.00000000 |
| C         | -0.27762100          | 2.89067200  | 0.00000000 |
| N         | -0.85987600          | 3.90858000  | 0.00000000 |
| N         | 3.37431100           | -2.18234100 | 0.00000000 |
| Li        | -1.81438400          | 5.47410600  | 0.00000000 |
| Li        | 5.24141600           | -2.36589900 | 0.00000000 |
| Li        | -0.96264200          | -2.64588700 | 0.00000000 |
| S         | -2.61679100          | -0.97962600 | 0.00000000 |
| <b>2D</b> | <b>-2833.7925174</b> |             |            |
| C         | 0.69235200           | -0.68039100 | 0.00000000 |
| C         | -0.69000500          | -0.64805700 | 0.00000000 |
| C         | 0.00000000           | 0.55152900  | 0.00000000 |
| N         | -1.99155900          | -1.01795600 | 0.00000000 |
| N         | 1.78412100           | -1.42057400 | 0.00000000 |
| C         | -2.35487500          | -2.26670700 | 0.00000000 |
| C         | 2.96445900           | -0.90739100 | 0.00000000 |
| N         | 4.08528900           | -0.56407200 | 0.00000000 |
| N         | -2.77329500          | -3.35561500 | 0.00000000 |
| Li        | 5.82484200           | 0.01965900  | 0.00000000 |
| Li        | -3.35679300          | -5.14054500 | 0.00000000 |
| Li        | -2.37082500          | 0.95958300  | 0.00000000 |
| Se        | -0.34397500          | 2.37345700  | 0.00000000 |
| <b>3A</b> | <b>-808.5683407</b>  |             |            |
| C         | 0.00000000           | 0.74878800  | 0.00000000 |
| C         | -0.69936600          | -0.46463500 | 0.00000000 |
| C         | 0.66673600           | -0.47839300 | 0.00000000 |
| C         | -0.04761900          | 2.12753300  | 0.00000000 |
| C         | -1.94433500          | -1.14432600 | 0.00000000 |
| C         | 1.90516200           | -1.18261300 | 0.00000000 |
| C         | 1.18366500           | 2.78613800  | 0.00000000 |
| C         | -1.39279800          | 2.74512600  | 0.00000000 |
| C         | -3.10905000          | -0.35766100 | 0.00000000 |
| C         | -1.90026400          | -2.53568700 | 0.00000000 |
| C         | 1.84867100           | -2.57449500 | 0.00000000 |
| C         | 3.06582200           | -0.40534600 | 0.00000000 |
| N         | -3.94571200          | 0.44925200  | 0.00000000 |
| N         | -1.95420100          | 3.83129700  | 0.00000000 |

|    |             |             |            |
|----|-------------|-------------|------------|
| N  | 2.23202000  | 3.31220900  | 0.00000000 |
| N  | 3.91627800  | 0.39026400  | 0.00000000 |
| N  | 1.61379100  | -3.71641200 | 0.00000000 |
| N  | -1.67665500 | -3.68100800 | 0.00000000 |
| Li | -3.38749000 | 2.44853300  | 0.00000000 |
| Li | -0.04918000 | -4.68255300 | 0.00000000 |
| Li | 3.85053900  | 2.33875400  | 0.00000000 |

**3B -732.3481733**

|    |             |             |            |
|----|-------------|-------------|------------|
| C  | 0.31565300  | -0.94724900 | 0.00000000 |
| C  | -1.00203700 | -0.48936500 | 0.00000000 |
| C  | 0.00000000  | 0.43387800  | 0.00000000 |
| C  | 1.18624700  | -2.01509900 | 0.00000000 |
| C  | 0.46868900  | 1.77832100  | 0.00000000 |
| C  | 2.53500600  | -1.68007700 | 0.00000000 |
| C  | 0.61070400  | -3.41978600 | 0.00000000 |
| C  | -0.49363800 | 2.78732300  | 0.00000000 |
| C  | 1.85162300  | 1.97555100  | 0.00000000 |
| N  | -0.58428600 | -3.67528600 | 0.00000000 |
| N  | 3.64212100  | -1.29695800 | 0.00000000 |
| N  | 3.01608800  | 1.96685000  | 0.00000000 |
| N  | -1.42217500 | 3.49254400  | 0.00000000 |
| N  | -2.33033300 | -0.79985500 | 0.00000000 |
| C  | -3.11615500 | 0.23677400  | 0.00000000 |
| N  | -3.81045300 | 1.18140200  | 0.00000000 |
| Li | -3.28998300 | 3.00478000  | 0.00000000 |
| Li | 4.26344300  | 0.47554000  | 0.00000000 |
| Li | -2.21122400 | -2.82782100 | 0.00000000 |

**3C -659.9376174**

|    |            |             |             |
|----|------------|-------------|-------------|
| C  | 0.00000000 | 0.69375600  | 0.19998900  |
| C  | 0.00000000 | 0.00000000  | 1.39462100  |
| C  | 0.00000000 | -0.69375600 | 0.19998900  |
| C  | 0.00000000 | 1.95735300  | -0.42849000 |
| C  | 0.00000000 | -1.95735300 | -0.42849000 |
| C  | 0.00000000 | 1.96049100  | -1.81850300 |
| C  | 0.00000000 | 2.99317200  | 0.53244600  |
| C  | 0.00000000 | -2.99317200 | 0.53244600  |
| C  | 0.00000000 | -1.96049100 | -1.81850300 |
| N  | 0.00000000 | 3.46282600  | 1.60461300  |
| N  | 0.00000000 | 1.71301500  | -2.95923800 |
| N  | 0.00000000 | -1.71301500 | -2.95923800 |
| N  | 0.00000000 | -3.46282600 | 1.60461300  |
| Li | 0.00000000 | 1.87966800  | 3.15770700  |

|    |            |             |             |
|----|------------|-------------|-------------|
| Li | 0.00000000 | -1.87966800 | 3.15770700  |
| Li | 0.00000000 | 0.00000000  | -3.86154900 |
| O  | 0.00000000 | 0.00000000  | 2.67626600  |

**3D -982.9298641**

|    |             |             |             |
|----|-------------|-------------|-------------|
| C  | 0.11618100  | -0.74072900 | 0.97794200  |
| C  | 1.16620400  | 0.22871500  | 0.66047200  |
| C  | -0.09475800 | 0.65967800  | 0.61884200  |
| C  | -0.27401700 | -1.96780600 | 0.21028300  |
| C  | -0.98439600 | 1.69036300  | 0.17841000  |
| C  | -1.60758500 | -2.17280600 | -0.06961000 |
| C  | 0.77772600  | -2.68274900 | -0.32492000 |
| C  | -0.31477400 | 2.79489300  | -0.34928200 |
| C  | -2.34779500 | 1.43772600  | 0.08140700  |
| N  | 1.81465300  | -3.11659000 | -0.67457000 |
| N  | -2.77011400 | -2.19650200 | -0.22914500 |
| N  | -3.45837100 | 1.08210600  | 0.01806200  |
| N  | 0.46205500  | 3.58331400  | -0.72907900 |
| Li | 3.05386000  | -1.67240900 | -0.55497200 |
| Li | 2.16253500  | 2.61284700  | -0.60839100 |
| Li | -3.98977900 | -0.75444200 | -0.27024900 |
| S  | 2.83511700  | 0.53075000  | 0.23141800  |

**3E -2986.2640569**

|    |             |             |             |
|----|-------------|-------------|-------------|
| C  | 0.45328400  | -0.75872200 | -0.96352200 |
| C  | -0.74838100 | 0.01607600  | -0.64696600 |
| C  | 0.41888500  | 0.65643400  | -0.59882000 |
| C  | 1.06009400  | -1.89695400 | -0.20315200 |
| C  | 1.13007600  | 1.81523600  | -0.15820400 |
| C  | 2.41838600  | -1.88072300 | 0.03264300  |
| C  | 0.16480500  | -2.76841600 | 0.38204100  |
| C  | 0.30393700  | 2.79222100  | 0.39808200  |
| C  | 2.51888600  | 1.79022400  | -0.08806800 |
| N  | -0.76113200 | -3.37177900 | 0.78647800  |
| N  | 3.57396200  | -1.71977700 | 0.15789200  |
| N  | 3.67404700  | 1.62552100  | -0.05029100 |
| N  | -0.57044800 | 3.45029600  | 0.81124800  |
| Li | -2.27258200 | -2.22298000 | 0.76538900  |
| Li | -2.13457600 | 2.28384800  | 0.77657100  |
| Li | 4.53121700  | -0.08964600 | 0.19109000  |
| Se | -2.59138300 | 0.04718400  | -0.17825500 |
